1  
2  
3  
4 **Hybrid peeling for fast and accurate calling, phasing, and imputation with sequence data of**  
5 **any coverage in pedigrees**

6  
7 Andrew Whalen\*, Roger Ros-Freixedes, David L Wilson, Gregor Gorjanc, and John M Hickey

8  
9 The Roslin Institute and Royal (Dick) School of Veterinary Studies, The University of Edinburgh,  
10 Midlothian, Scotland, UK

11

12 **Abstract**

13 In this paper we extend multi-locus iterative peeling to be a computationally efficient method for  
14 calling, phasing, and imputing sequence data of any coverage in small or large pedigrees. Our  
15 method, called hybrid peeling, uses multi-locus iterative peeling to estimate shared chromosome  
16 segments between parents and their offspring, and then uses single-locus iterative peeling to  
17 aggregate genomic information across multiple generations. Using a synthetic dataset, we first  
18 analysed the performance of hybrid peeling for calling and phasing alleles in disconnected  
19 families, families which contained only a focal individual and its parents and grandparents.  
20 Second, we analysed the performance of hybrid peeling for calling and phasing alleles in the  
21 context of the full pedigree. Third, we analysed the performance of hybrid peeling for imputing  
22 whole genome sequence data to the remaining individuals in the population. We found that hybrid  
23 peeling substantially increase the number of genotypes that were called and phased by leveraging  
24 sequence information on related individuals. The calling rate and accuracy increased when the full  
25 pedigree was used compared to a reduced pedigree of just parents and grandparents. Finally, hybrid  
26 peeling accurately imputed whole genome sequence information to non-sequenced individuals.  
27 We believe that this algorithm will enable the generation of low cost and high accuracy whole  
28 genome sequence data in many pedigreed populations. We are making this algorithm available as  
29 a standalone program called AlphaPeel.

## 30 **Introduction**

31 In this paper we extend multi-locus iterative peeling to be a computationally efficient method  
32 for calling, phasing, and imputing low coverage sequence data in large pedigrees. In the past few  
33 years the use of genomic data has expanded greatly. The widespread genotyping of animals  
34 empowers breeding via genomic selection (Meuwissen et al., 2001, 2016) and biological discovery  
35 via genome wide association studies (Burton et al., 2007; Visscher et al., 2017). The accuracy of  
36 genomic selection and the power of genome wide association studies depend on both the number  
37 of individuals that have genomic data and its density (e.g., Daetwyler et al., 2008; Hayes et al.,  
38 2009; Hickey et al., 2014; Gorjanc et al., 2015) . The goal is then to generate genomic data on as  
39 many individuals as possible at as high of a density as possible with the upper limit being the  
40 presence of whole genome sequence on hundreds of thousands or millions of individuals (Hickey,  
41 2013; Daetwyler et al., 2014; Veerkamp et al., 2016).

42 Even though the cost of obtaining whole genome sequence data on an individual has  
43 decreased, it is still prohibitively expensive to obtain high coverage whole genome sequence data  
44 on tens of thousands of individuals. An emerging strategy in breeding populations is to obtain a  
45 mix of high and low coverage sequence data on a subset of individuals, and then propagate that  
46 information between related individuals to call whole genome sequence genotypes for all  
47 population members, some of which may only have SNP array genotype data (Hickey, 2013). This  
48 strategy exploits the high degree of relatedness and thus haplotype sharing between individuals in  
49 a breeding population, meaning that a haplotype can be inferred at high accuracy by low coverage  
50 sequencing of different individuals that share the haplotype. Algorithms have already been  
51 developed for selecting the individuals to sequence in such a context (Cheung et al., 2014; Gonen

52 et al., 2017; Ros-Freixedes et al., 2017). What remains to be developed is a method for efficiently  
53 propagating the information from sequence data between related individuals.

54 Past methods for using mixed coverage sequence data to call, phase, and impute genotypes  
55 have primarily exploited linkage disequilibrium, e.g. MaCH (Li et al., 2010), Beagle (Browning  
56 and Browning, 2016, 2007). Linkage disequilibrium based methods perform well, particularly in  
57 human settings where individuals are mostly unrelated and there is limited pedigree data. However,  
58 these methods do not exploit the large amount of information available when pedigrees are  
59 available (but see, Browning and Browning, 2009; O’Connell et al., 2014). In contrast, pedigree  
60 based methods can have a higher accuracy and lower computational cost than linkage  
61 disequilibrium based methods, particularly in populations with closely related individuals and  
62 accurate pedigrees across multiple generations (e.g., Hickey et al., 2011; Cheung et al., 2013;  
63 VanRaden et al., 2015). Pedigree based methods are particularly appealing for mixed coverage  
64 sequence data on relatives, due to being able to collapse information across the long haplotype  
65 segments shared between individuals, their ancestors and their descendants.

66 Single-locus and multi-locus peeling are two pedigree-based methods that model an  
67 individual’s haplotype based on the haplotypes of their parents and offspring. There is a large body  
68 of literature on peeling methods in genetics (e.g., Elston and Stewart, 1971; Cannings et al., 1976,  
69 1978; Lander and Green, 1987; Fernández et al., 2001; Totir et al., 2009; Cheung et al., 2013) and  
70 related methods in other areas (e.g., Lauritzen and Sheehan, 2003; Bishop, 2007; Koller and  
71 Friedman, 2009). Since our interest is in efficient methods that could handle whole genome  
72 sequence data in multi-generational pedigrees with loops, we focus on approximate (iterative)  
73 peeling methods, in particular to the single-locus method of Kerr and Kinghorn (1996) and multi-  
74 locus method of Meuwissen and Goddard (2010). In single-locus peeling all loci are treated

75 independently and so linkage between loci is not exploited. In contrast multi-locus peeling tracks  
76 the linkage between loci allowing for information at one locus to be used at a neighbouring locus,  
77 which has a large potential with sequence data. Although multi-locus peeling is exploiting more  
78 information and is therefore more accurate, it is computationally more expensive due the high cost  
79 of calculating the segregation estimates at each locus, and currently is ill-suited for whole genome  
80 sequence data.

81 In this paper we present a hybrid peeling method that is scalable to whole genome sequence  
82 data on tens of thousands of individuals. In hybrid peeling segregation estimates are calculated on  
83 a small subset of loci, and then fast single-locus style peeling operations are used on the remaining  
84 loci. This approach exploits the benefits of using linkage from multi-locus peeling while still being  
85 able to scale to whole genome sequence data on thousands of animals. In what follows we first  
86 present the hybrid peeling method, and then present results of its performance on a synthetic  
87 dataset based on a real commercial pig population with 60,000 animals on a single chromosome  
88 with 700,000 segregating loci. We found that hybrid peeling substantially increases the number of  
89 genotypes that were called and phased by leveraging sequence information on related individuals.  
90 The calling rate and accuracy increased when the full pedigree was used compared to a reduced  
91 pedigree of just parents and grandparents. Finally, we found that hybrid peeling accurately imputes  
92 whole genome sequence information to non-sequenced individuals. We are making this algorithm  
93 available as a standalone program called AlphaPeel.

94

## 95 **Materials and Methods**

### 96 **Peeling methods**

97 Peeling is a method for inferring the genotype and phased alleles of an individual based on their

98 own genotype information and the genotype information of their ancestors and descendants. The  
99 genotype information can be partially or fully (in)complete or even incorrect for some pedigree  
100 members. This inference problem is computationally intractable when considering whole genome  
101 sequence in the context of large multi-generational pedigrees with loops (Cannings et al., 1978;  
102 Lauritzen and Sheehan, 2003; Piccolboni and Gusfield, 2003; Totir et al., 2009). Iterative peeling  
103 approximates this problem through a series of peeling up and peeling down operations (Van  
104 Arendonk et al., 1989; Kerr and Kinghorn, 1996; Meuwissen and Goddard, 2010). In the following  
105 we refer to iterative peeling simply as peeling. In a peeling up operation information from an  
106 individual's descendants and their mates is used to infer the individual's alleles. In a peeling down  
107 operation information from an individual's ancestors is used to infer the individual's alleles.  
108 Repeated peeling operations propagates genetic information between distant members of a  
109 pedigree.

110 Peeling relies on a model of how alleles are transmitted between a parent and their offspring.  
111 Single-locus and multi-locus peeling differ in how they model the transmission of alleles. In single-  
112 locus peeling, both parental alleles are assumed to be inherited with equal probability at all loci.  
113 In multi-locus peeling, it is assumed that there is a high probability that the nearby loci are inherited  
114 from the same paternal gamete. To enable the sharing of information between loci, multi-locus  
115 peeling estimates the segregation at each locus, the likelihood that each pair of grandparental  
116 gametes was inherited at a locus. Hybrid peeling is a computationally efficient approximation to  
117 multi-locus peeling. Like multi-locus peeling it utilizes information from nearby loci to determine  
118 which allele is inherited at a locus. Unlike multi-locus peeling, it only estimates segregation on a  
119 small subset of loci, and linearly interpolates segregation estimates at un-evaluated loci.

120 We describe these peeling operations in detail below. For single-locus peeling we follow the

121 previous work of Kerr and Kinghorn (1996) and for multi-locus peeling we follow the previous  
122 work of Meuwissen and Goddard (2010).

123

### 124 **Single-locus peeling**

125 In single-locus peeling we estimate the likelihood of each of an individual's alleles at a locus  
126 as the product of their parents' alleles (anterior), offsprings' alleles (posterior), and their own  
127 genomic data (penetrance). For a biallelic loci, we have a set of four possible ordered pairs of  
128 alleles (aa, aA, Aa, AA), where the first allele in each pair is inherited from the father and the  
129 second allele is inherited from the mother. The probability that individual  $i$  has alleles  $h_i$  is:

$$130 \quad p_i(h_i) = \text{anterior}_i(h_i) \text{posterior}_i(h_i) \text{penetrance}_i(h_i). \quad (1)$$

131 We examine each of these terms separately.

132 The penetrance term gives the likelihood that an individual has a given set of alleles based  
133 on the available genomic data, obtained either from a SNP array or sequencing. If no information  
134 is available, we set the penetrance to a constant value, i.e.,  $\text{penetrance}_i(h_i) = 1$ . If we have SNP  
135 array data, we set  $\text{penetrance}_i(h_i) = 1 - \varepsilon$  if  $h_i$  is consistent with the genotype on the SNP array, and  
136  $\text{penetrance}_i(h_i) = \varepsilon$  otherwise, where  $\varepsilon$  accounts for a small error rate in SNP array genotype data.  
137 If we have sequencing data with  $n_{\text{ref}}$  sequence reads of the reference allele, a, and  $n_{\text{alt}}$  sequence  
138 reads of the alternative allele, A, then:

$$139 \quad \text{penetrance}_i([aa, aA, Aa, AA]) = [(1 - \delta)^{n_{\text{ref}}} \delta^{n_{\text{alt}}}, .5^{n_{\text{ref}} + n_{\text{alt}} - 1}, .5^{n_{\text{ref}} + n_{\text{alt}} - 1}, \delta^{n_{\text{ref}}} (1 - \delta)^{n_{\text{alt}}}], \quad (2)$$

140 where  $\delta$  accounts for a small error rate in sequence data.

141 The anterior estimate captures the information about an individual's haplotypes gained from  
142 their parents' haplotypes. If an individual does not have any genotyped parents, then we use the  
143 minor allele frequency,  $p$ , to calculate the anterior estimate:

$$144 \quad \text{anterior}_i([aa, aA, Aa, AA]) = [p^2, p(1-p)/2, p(1-p)/2, (1-p)^2]. \quad (3)$$

145 For an individual with parents the anterior estimate is:

$$146 \quad \text{anterior}_i(h_j) = \sum_{h_m, h_f} \text{trace}(h_j | h_m, h_f) p(h_m, h_f), \quad (4)$$

147 where  $p(h_m, h_f)$  is the joint probability that the mother has alleles  $h_m$  and the father has alleles  $h_f$ .

148 The trace is a function that gives the likelihood that the child inherits alleles  $h_i$  given their parent's

149 alleles, i.e.,  $\text{trace}(h_j | h_m, h_f) = p(h_j | h_m, h_f)$ . Examples of the trace function when inheriting from a

150 single parent are given in Table 1(a). The joint probability of the parental alleles is calculated by

151 combining the anterior and posterior estimates for both parents except for the information that

152 pertains to individual  $i$ . This gives:

$$153 \quad p(h_m, h_f) = \text{anterior}_m(h_m) \text{penetrance}_m(h_m) \text{posterior}_{m,f}(h_m) \\ 154 \quad \text{anterior}_f(h_f) \text{penetrance}_f(h_f) \text{posterior}_{f,m}(h_f) \\ 155 \quad \text{posterior}_{f,m,i}(h_m, h_f). \quad (5)$$

156 The first line calculates the probability of the mother's alleles,  $h_m$ , independent of shared children

157 with  $f$ . The second line calculates the probability of the father's alleles,  $h_f$ , independent of shared

158 children with  $m$ . The third line calculates the probability of both parents' alleles based on their

159 shared children except for individual  $i$ .

160 There are two types of posterior terms. First,  $\text{posterior}_{m,f}$  is the joint probability of two

161 parents' alleles,  $m$  and  $f$ , based on all their shared children. Second,  $\text{posterior}_m$  is the probability of

162 a single parent's alleles based on all their mates and children. We can calculate  $\text{posterior}_{m,f}$  by:

$$163 \quad \text{posterior}_{m,f}(h_m, h_f) = \prod_c \sum_{h_c} \text{trace}(h_c | h_m, h_f) \text{posterior}_c(h_c) \text{penetrance}_c(h_c), \quad (6a)$$

164 which is the product of the probability that a child,  $c$ , inherits alleles  $h_c$ , based on their parent's

165 alleles, marginalized over the possible alleles for  $c$ , and multiplied across all children. We can then

166 calculate  $\text{posterior}_m(h_m)$  as the product of the  $\text{posterior}_{m,f}(h_m, h_f)$  for all of the mates of  $m$



167 marginalized over the likelihood that  $k$  has alleles  $h_k$ :

$$168 \quad \text{posterior}_m(h_m) = \prod_k \sum_{h_k} \text{posterior}_{m,k}(h_m, h_k) p(h_m, h_k). \quad (6b)$$

169 The remaining terms are calculated by removing the individuals that relate to them in the  
170 equations:

$$171 \quad \text{posterior}_{m,f,i}(h_m, h_f) = \prod_{c \neq i} \sum_{h_c} \text{trace}(h_c | h_m, h_f) \text{posterior}_c(h_c) \text{penetrance}_c(h_c), \quad (6c)$$

$$172 \quad \text{posterior}_{m,f}(h_m) = \prod_{k \neq f} \sum_{h_k} \text{posterior}_{m,k}(h_m, h_k) p(h_m, h_k). \quad (6d)$$

173 Together the posterior, anterior, and penetrance terms give the probability of individual's  
174 alleles (Equation 1). Information from siblings, parents, and grandparents is contained in the  
175 anterior term. Information from children, grandchildren, and their mates is contained in the  
176 posterior term. An individual's own information is only counted a single time, in the penetrance  
177 function. When estimating the genotype of a set of parents in the anterior term, the focal  
178 individual's penetrance and anterior terms are excluded from the calculation (Equation 5), which  
179 ensures that information from an individual is included in only the anterior or posterior term but  
180 not both.

181 To perform peeling we initialize the population by setting all the posterior terms to a constant  
182 value, i.e. 1. We first peel down, updating the anterior terms for all individuals. We then peel up  
183 the pedigree, updating the posterior terms for all individuals. These peeling operations are repeated  
184 until the allele estimates for all of the individuals in the population converge. There are two model  
185 parameters that need to be estimated, the minor allele frequency,  $p$ , and error rates,  $\varepsilon$  and  $\delta$ . We  
186 found that an easy way to update them is by setting them equal to their observed values after each  
187 pair of peeling (up and down) operations. We tested using a single error rate for all loci or using a  
188 locus specific error rate and found that the locus specific error rate lead to a slight increase in  
189 accuracy and so used a locus specific error rate for  $\varepsilon$  and  $\delta$ . Due to the dependence of the anterior

190 terms and posterior terms on the anterior terms and posterior terms of other individuals in the  
191 population, the order in which they are updated is important and can decrease the overall number  
192 of peeling operations that need to be performed. We follow the updating pattern given in Kerr and  
193 Kinghorn (1996) by first updating the anterior terms for the oldest individuals in the population,  
194 and then updating the anterior terms for their children and their children's children. The posterior  
195 estimates are updated in reverse order; from the most recent generation to the most distant.

196

### 197 **Multi-locus peeling**

198 Multi-locus peeling extends single-locus peeling by modifying the trace function to be sensitive to  
199 which grandparental gamete was likely to have been inherited at nearby loci. In single-locus  
200 peeling we assume that each parental allele is inherited with equal probability, and that the alleles  
201 at neighbouring loci are inherited independently. This is not the case; due to the small number of  
202 recombinations per chromosome, children inherit grandparental gametes in large blocks from their  
203 parents. This means that if we know which grandpaternal gamete a child inherits at one locus, we  
204 can also know which gamete they likely inherit from at nearby loci. In the context of the peeling  
205 operations, if we know which grandpaternal gamete a child is inheriting from, we can update the  
206 peeling operations so that only the alleles from that gamete will be transmitted, as in Table 1b.  
207 Uncertainty in haplotype inheritance can be incorporated in the model by marginalizing over  
208 possible inherited gametes.

209 More formally, we track the set of inherited haplotypes in terms of a segregation estimate,  
210 which gives the likelihood that a child inherits the each of the four possible pairs of grandpaternal  
211 gametes (pp, pm, mp, mm); relating to whether the father (first allele) or the mother (second allele)  
212 passes their grandpaternal (p) or grandmaternal (m) gamete at that locus. We can then build the

213 trace function by marginalizing over segregation estimates:

$$214 \quad \text{trace}(h_i | h_m, h_f) = \sum_s \text{trace}(h_i | h_m, h_f, \text{seg}_{i,j}=s) p(\text{seg}_{i,j}=s), \quad (7)$$

215 where  $p(\text{seg}_{i,j}=s)$  is the likelihood that individual  $i$  has segregation  $s$  at locus  $j$ .  $\text{trace}(h_i | h_m, h_f,$   
 216  $\text{seg}_{i,j}=s)$  is the likelihood that the child inherits allele  $h_i$  given their parental allele and their  
 217 segregation (see Table 1b for an example). To perform peeling, we substitute the trace function in  
 218 Equations 4, 6a-d with the trace function Equation 7.

219 The segregation estimate at each locus is calculated by measuring how well the segregation  
 220 models the current locus and how well the segregation estimate matches that of adjacent loci:

$$221 \quad p(\text{seg}_{i,j}=s) = p(\text{seg}_{i,j}=s | \text{seg}_{i,j-1}, \text{seg}_{i,j+1}) \sum_{h_i} \sum_{h_f} \sum_{h_m} p(\text{seg}_{i,j} | h_i, h_f, h_m).$$

222 The first term accounts for the recombination rate between loci and the second term accounts for  
 223 the additional information gained from the genotype estimate at the current allele:

$$224 \quad p(\text{seg}_i | \text{seg}_{i-1}, \text{seg}_{i+1}) = p(\text{seg}_i | \text{seg}_{i-1}) p(\text{seg}_{i+1} | \text{seg}_i), \quad (8)$$

$$225 \quad p(\text{seg}_i | \text{seg}_{i-1}) = (1-\gamma)^{2-\#changes} \gamma^{\#changes}, \quad (9)$$

226 where,  $\#changes$  is the number of gametes that switch (up to 2) between  $\text{seg}_i$  and  $\text{seg}_{i-1}$ , and  $\gamma$  is  
 227 recombination rate. We estimate  $p(\text{seg}_i | \text{seg}_{i-1}, \text{seg}_{i+1})$  using the forward-backward algorithm  
 228 (Rabiner, 1989). To calculate the likelihood of a segregation estimate given the observed data at a  
 229 locus, we marginalize over possible allele combinations:

$$230 \quad p(\text{seg}_{i,j} | h_i, h_f, h_m) = \text{trace}(h_i | h_f, h_m, \text{seg}_{ij}) \text{penetrance}_i(h_i) \text{posterior}_i(h_i)$$

$$231 \quad \text{anterior}_m(h_m) \text{penetrance}_m(h_m) \text{posterior}_{m,f}(h_m)$$

$$232 \quad \text{anterior}_f(h_f) \text{penetrance}_f(h_f) \text{posterior}_{f,m}(h_f)$$

$$233 \quad \text{posterior}_{m,f,i}(h_m, h_f). \quad (10)$$

234 The first line is the likelihood of the child's alleles, the second is the likelihood of the mother's  
 235 alleles, the third is the likelihood of the father's alleles, and the fourth is the joint likelihood of the

236 parents' alleles.

237       This algorithm is performed in a series of forward-backward passes where at each locus all  
238 individuals in the population are updated by the peeling up and peeling down operation.  
239 Segregation estimates are then re-estimated for each individual. At the end of each pass we updated  
240 the recombination rate,  $\gamma$ , error rate,  $\varepsilon$  and  $\delta$ , and minor allele frequency,  $p$ , by setting them to their  
241 observed values. Similar to the error rate we found that using a locus specific recombination rate  
242 slightly increased accuracy and so used a locus specific recombination rate. We found that between  
243 10-20 cycles was enough to obtain convergence in large multi-generational livestock pedigrees  
244 with 60,000+ members.

245

#### 246 **Hybrid peeling**

247       Hybrid peeling is a computationally efficient approximation to multi-locus peeling. In  
248 preliminary work we found that the primary computational cost of multi-locus peeling stemmed  
249 from updating the segregation estimates, Equation 10. When evaluating many loci on a  
250 chromosome we should expect that the segregation estimates at nearby loci should be identical.  
251 Because of this, it should be possible to evaluate the segregation estimates at only a subset of loci,  
252 and interpolate segregation estimates on the remaining loci. These estimates can then be used to  
253 create a new trace function for peeling operations.

254       More formally, we divide the set of loci into two sets, A and B, with  $|A| \ll |B|$ , e.g., A is a  
255 subset of loci on a high-density SNP array, and B is the entire set of segregating loci. We perform  
256 multi-locus peeling on A to calculate segregation estimates. We then perform single-locus peeling  
257 on B using Equation 7 as the trace function with interpolated segregation estimates:

$$258 \quad \text{seg}_{i,k} = a \text{seg}_{i,j} + (1-a) \text{seg}_{i,j+1}, \quad (11)$$

259 where  $j$  and  $j+1$  are the loci in the set  $A$  that flank locus  $k$ , and  $a$  is the proportional distance  
260 between locus  $k$  and locus  $j$ :

$$261 \quad a = d(k, j) / d(j, j+1). \quad (12)$$

262 Distance can be calculated either in terms of base pairs, centiMorgans, or number of intermediary  
263 loci. The exact measure of distance should only have a minimal impact on performance: if a  
264 sufficiently large number of loci is used in the set  $A$  then adjacent segregation estimates should be  
265 nearly equal, i.e.,  $seg_{i,j} = seg_{i,j+1}$ , leading Equation 11 to reduce to  $seg_{i,j}$  and no longer depend on the  
266 distance metric used.

267 The aim of the hybrid technique is to make multi-locus peeling more computationally  
268 tractable when applying it to large pedigrees. We evaluate the performance of this algorithm on a  
269 synthetic dataset.

270

## 271 **Analysis**

272 We examined the performance of hybrid peeling for calling, phasing, and imputing alleles  
273 with sequence data of different coverages in pedigrees. To perform these analyses, we simulated  
274 genomes for 64,598 animals using a multi-generational pedigree derived from a real commercial  
275 pig breeding line. We assumed some animals had high-density or low-density SNP array genotypes  
276 from routine genomic selection. In addition, we generated mixed coverage sequence data for a  
277 subset of focal animals. We then carried out three sets of analyses. First, we analysed the  
278 performance of hybrid peeling in calling and phasing in disconnected families, families which  
279 contained only a focal animal and its parents and grandparents. Second, we analysed the  
280 performance of hybrid peeling in calling and phasing in the context of the full pedigree. Third, we

281 analysed the performance of hybrid peeling for whole genome sequence imputation. In the  
282 following we describe in detail how we simulated and analysed data.

283

## 284 **Data**

285 Genomes were generated using the Markovian Coalescent Simulator (MaCS) (Chen et al.,  
286 2009) and AlphaSim (Faux et al., 2016). We generated 1,000 base haplotypes for each of 10  
287 chromosomes, assuming a chromosome length of  $10^8$  base pairs, a per site mutation rate of  
288  $2.5 \times 10^{-8}$ , a per site recombination rate of  $1 \times 10^{-8}$ , and an effective population size ( $N_e$ ) that varied  
289 over time in accordance with estimates for a livestock population (MacLeod et al., 2013). The  
290 resulting haplotypes had about 700,000 segregating loci per chromosome. On each of the  
291 chromosomes we designated 2,000 evenly distributed loci as markers on a high-density SNP array  
292 and a subset of 500 as markers on a low-density SNP array.

293 We used AlphaSim to drop the base haplotypes through a multi-generational pedigree of  
294 64,598 animals from a real commercial pig breeding line. We assigned SNP array data to animals  
295 in line with routine genotyping for genomic selection in the population; 45,592 animals were  
296 genotyped with high-density SNP array, 11,015 animals were genotyped with low-density SNP  
297 array, and 7,991 animals were not genotyped. We generated sequence data in line with the  
298 strategies implemented in the population. The goal was to use roughly \$300,000 worth of resources  
299 to sequence and impute the entire population. First, the top 475 sires (all sires with more than 25  
300 progeny) were sequenced at 2x. Second, AlphaSeqOpt (Gonen et al., 2017) was used to identify  
301 focal animals and their parents and grandparents (211 in total) to sequence and the coverages they  
302 should be sequenced at. AlphaSeqOpt was run using the high-density SNP array data on all  
303 chromosomes with an option to assign an individual sequencing coverage of either 1x, 2x, 15x, or

304 30x, and a total budget of \$71,000. Third, the top 50 dams (based on number of offspring and  
305 grandoffspring with and without a sequenced sire) were sequenced at 2x and the next 450 dams  
306 were sequenced at 1x. Finally, AlphaSeqOpt2 (Ros-Freixedes et al.) was used to identify 800  
307 individuals to be sequenced at 1x, to top-up the accumulated coverage of common haplotypes to  
308 10x. In total, we generated sequenced data for 1,912 animals at a range of coverages for a cost of  
309 \$289,312. We partitioned this data into three sequencing sets: i) the *focal* identified with  
310 AlphaSeqOpt, ii) the *focal plus low coverage sires* which also included the top 475 sires, and iii)  
311 *focal plus all low coverage individuals* which included all the sequenced animals. A breakdown  
312 of the total cost and sequencing coverage by these sets is given in Table 2. We assumed that the  
313 cost of obtaining a DNA library for an individual was \$39 and the cost of sequencing that library  
314 for an individual at 1x was \$68, at 2x was \$136, at 15x was \$408, and at 30x was \$816. The costs  
315 were assumed to be non-linear to reflect current industry costs.

316 Sequence data was simulated by sampling sequencing reads for the 700,000 segregating loci  
317 on the chromosome 10. The number of reads was generated using a Poisson-Gamma distribution  
318 which allowed the number of sequence reads per locus to vary along the genome and between  
319 individuals (Li et al., 2010). First, a sequenceability ( $\gamma_j$ ) of each of the 700,000 loci along the  
320 genome was sampled from a gamma distribution, with shape and scale parameters respectively  
321 equal to  $\alpha = 4$  and  $1/\alpha = .25$ . Second, the number of reads ( $r_{i,j}$ ) per individual  $i$  at locus  $j$  was then  
322 sampled from a Poisson distribution with mean equal to  $\mu_{i,j} = x_i \gamma_j$ , where  $x_i$  was the targeted  
323 coverage for individual. Third, sequencing reads were generated by randomly sampling alleles  
324 from the two gametes of individual  $i$  at locus  $j$ , accounting for a sequencing error ( $\epsilon = 0.001$ ).

325

326 **Calling and phasing in disconnected families**

327 We tested the ability of hybrid peeling to call genotypes and phase alleles in sequenced  
328 individuals using information from their parents and grandparents. For this we selected 10  
329 disconnected families (consisting of a focal individual and its parents and grandparents) from the  
330 full pedigree, and analysed the effect of sequencing coverage on our ability to call and phase the  
331 individual's genotypes. To perform this, we ran the hybrid peeling when the focal individual was  
332 sequenced at 1x, 2x, 5x, 15x, or 30x coverage, and when its parents or grandparents were  
333 sequenced at 0x, 1x, 2x, 5x, 15x, or 30x coverage. We generated data for each of these scenarios  
334 separately. We assumed that all of the parents or all of the grandparents were sequenced at the  
335 same coverage, and that all family members had high-density SNP array data.

336 To call genotypes and phased alleles, we extracted the allele probabilities generated by  
337 hybrid peeling and made a call if the probability of an allele was greater than a pre-defined  
338 threshold. For all analyses we used a calling threshold of .98. Scenarios were compared on the  
339 percentage of called genotypes (genotype yield) and phased alleles (phase yield).

340

#### 341 **Calling and phasing with the full pedigree**

342 Next, we tested the ability of hybrid peeling to call genotypes and phase alleles in sequenced  
343 individuals using information from the full pedigree. To perform this, we ran hybrid peeling twice.  
344 First, we ran it separately for each disconnected family, consisting of an individual, their parents,  
345 and their grandparents, with (potentially missing or low coverage) SNP array and sequence data.  
346 Second, we ran it with SNP array and sequence data on all individuals in the pedigree. The  
347 sequencing coverage for each individual was determined by their coverage in the *focal and all low*  
348 *coverage* condition. We compared the genotype and phase yield between runs and compared the  
349 correlation between individual's called genotypes and the true genotypes (genotype accuracy) and



350 correlation between individual's phased alleles and the true phase/haplotype (phase accuracy)  
351 between runs.

352

### 353 **Imputing whole genome sequence**

354 Last, we tested the ability of hybrid peeling to impute whole genome sequence for non-  
355 sequenced individuals in the full pedigree. We ran hybrid peeling on all of the individuals in the  
356 full pedigree, using all available sequence and SNP array data. Hybrid peeling was run three times,  
357 using either the sequence coverages from the *focal*, *focal and low coverage sires*, or *focal and all*  
358 *low coverage* conditions. Imputation accuracy was measured as correlation between an  
359 individual's imputed dosages and the true genotypes.

360

### 361 **Data availability**

362 Simulated genotype and sequence data are available from the authors upon request.

363

### 364 **Code availability**

365 To perform hybrid peeling we used the software package AlphaPeel, which is available from the  
366 AlphaGenes website (<http://www.alphagenes.roslin.ed.ac.uk>). The code for generating simulated  
367 sequence data from genotype data is available from the authors on request.

368

369

## Results

370 Overall, we found that hybrid peeling had high yield and accuracy for called genotypes and phased  
371 alleles. It also had a high accuracy of imputing whole genome sequence data to non-sequenced  
372 individuals.

373

### 374 **Calling and phasing in disconnected families**

375 We found that hybrid peeling gave high yield and accuracy of called genotypes and phased alleles  
376 even in the presence of low coverage sequence reads. The results of these simulations are given in  
377 Figure 1.

378 The primary determiner of genotype yield was the individual's own degree of sequencing  
379 coverage. If neither the individual's parents nor grandparents were sequenced, then if the  
380 individual was sequenced at 1x the genotype yield was 0.6%, and increased to 5% at 2x, 39% at  
381 5x, 76% at 10x, and 98% at 30x. These values greatly increased if the parents were sequenced at  
382 high coverage. If the individual's parents were both sequenced at 30x, then the genotype yield was  
383 56% at 1x, 61% at 2, 75% at 5x, 90% at 10x, and 99% at 30x. Adding in additional coverage on  
384 grandparents increased accuracy even if the parents had 30x coverage. If both the parents and the  
385 grandparents had 30x coverage then the genotype yield was 88% at 1x, 90% at 2x, 94% at 5x, 97%  
386 at 10x, and 99% at 30x. In all cases, the ratio of correctly called genotypes to incorrectly called  
387 genotypes was greater than .995 (median .999).

388 A similar pattern of results was found when evaluating phase yield. In this case, although  
389 an individual's own sequencing coverage was an important determiner for phase yield, high  
390 coverage on both the parents and the grandparents were needed to phase all the alleles. If neither  
391 the individual's parents nor grandparents were sequenced, then the phase yield was .7% at 1x, 6%

392 at 2x, 35% at 5x, 59% at 10x, and 70% at 30x. The low phase yield at 30x is due to the inability to  
393 phase heterozygous loci without information from relatives. Sequencing the parents at high  
394 coverage substantially increased the phase yield, and continued to do so even if the individual was  
395 sequenced at high coverage. If the parents of the individual were sequenced at 30x, then the phase  
396 yield was 72% at 1x, 74% at 2x, 82% at 5x, 89% at 10x and 94% at 30x. If both the individual's  
397 parents and grandparents were sequenced at 30x, then the phase yield increased to 94% at 1x, 95%  
398 at 2x, 96% at 5x, 98% at 10x, and 99% and 30x. In all cases, the ratio of correctly phased alleles  
399 to incorrectly phased alleles was greater than 0.989 (median .999).

400

#### 401 **Calling and phasing with the full pedigree**

402 We examined the effect of using all sequence data and the full pedigree on calling genotype and  
403 phase yield and accuracy of sequenced individuals. The gains in yield and accuracy in comparison  
404 to using data from disconnected families are plotted in Figure 2. We found that including the full  
405 pedigree greatly increased both genotype and phase yield and accuracy. The gains were smaller  
406 for high coverage individuals compared to low coverage individuals. For example, phase accuracy  
407 increased on average from 0.85 to 0.97 for 30x individuals, but increased on average from 0.67 to  
408 0.89 for 1x individuals.

409 The gains in accuracy were also not equal for all individuals in the pedigree; some  
410 individuals had only a small gain in accuracy, whereas others had a large gain in accuracy. This  
411 difference was particularly pronounced for 1x individuals where the phase yield on average  
412 increased from 0.11 to 0.67, but the standard deviation increased from 0.13 to 0.28. If all  
413 individuals were influenced equally by including the full pedigree, we should expect an increase  
414 in mean but not a corresponding increase in standard deviation. The increased variability is a

415 consequence of the different sequencing coverages on relatives who are outside of the immediate  
416 family. We found that amount of sequencing coverage on immediate relatives (parents and  
417 grandparents) is a good predictor for the phase accuracy of 1x individuals in the disconnected  
418 family ( $r^2 = 0.37$ ), but is a weak predictor for the phase accuracy of those individuals in the full  
419 pedigree ( $r^2 = 0.13$ ). In contrast, adding in the sequencing coverage on all ancestors increased our  
420 ability to predict accuracy when assessing the phase accuracy in the full pedigree ( $r^2$  increased  
421 from 0.13 to 0.42), compared to when assessing the phase accuracy in the disconnected families,  
422 ( $r^2$  increased from 0.37 to 0.55). The higher overall  $r^2$  for disconnected families is likely due to the  
423 fact that performance in a disconnected family is easier to estimate because of the limited  
424 interaction between coverage levels for far away ancestors. A similar pattern of results was found  
425 for genotype accuracy and the genotype and phase yields.

426

### 427 **Imputing whole genome sequence**

428 Finally, we analysed the ability of hybrid peeling to impute whole genome sequence data to all  
429 non-sequenced individuals in the pedigree. Figure 3 plots the imputation accuracy for every  
430 individual as a function of their position in their pedigree. In Table 3 we present the median  
431 imputation accuracy stratified by the used sequencing sets and individual's SNP array genotype  
432 status. Overall, we imputed highly accurate allele dosages across the entire pedigree using the *focal*  
433 *plus all low coverage* sequencing set, with an accuracy of 0.987 for individuals with high-density  
434 SNP array data, 0.967 for individuals with low-density SNP array data, and 0.881 for non-  
435 genotyped individuals. We observed a qualitative difference in imputation accuracy in older

436 individuals. Because of this we stratified results for the first quintile (first 12,919 individuals) and  
437 the entire pedigree.

438         We observed three trends in imputation accuracy. First, individuals in the first quintile had  
439 on average lower imputation accuracy than the rest of the population. When we used the focal plus  
440 all low coverage sequencing set the imputation accuracy for the first quintile was 0.908, compared  
441 to the average imputation accuracy of 0.970. This decrease in imputation accuracy is due to the  
442 lower average sequencing coverage of ancestors for individuals in the first quintile (83x compared  
443 to the population average of 308x) and the small number of individuals with high-density SNP  
444 array data (0.2% in the first quintile compared to the population average of 70%).

445         Second, increasing the amount of sequencing resources increased accuracy for all  
446 individuals in the population. The largest contribution came from using focal individuals and their  
447 parents and grandparents, which gave imputation accuracy of 0.945. Further, adding low coverage  
448 sequence data of top sires increased imputation accuracy to 0.963. Finally, adding sequence data  
449 of top dams and the remaining low-coverage individuals increased the imputation accuracy only  
450 to 0.970, but had a proportionally larger influence on individuals in the first quintile where the  
451 imputation accuracy increased from 0.885 to 0.908. The effect is likely due to the fact that 78% of  
452 the top dams and top up individuals came from the first quintile.

453         Third, imputation accuracy for an individual depended on their SNP array genotype status.  
454 A comparison of the accuracies depending on their SNP array density is given in Table 3. Overall  
455 the difference between having high-density or low-density SNP array data tended to be small,  
456 whereas the difference between having SNP array data or not tended to be larger, although this  
457 difference decreased in the later generations. For the final four quintiles, the difference between  
458 having high-density or low-density SNP array data was negligible (both had an accuracy above

459 0.987), and the difference between having SNP array data or not was small (0.988 vs 0.959). In  
460 comparison, in the first quintile the difference between having high-density or low-density SNP  
461 array data was relatively larger (0.983 vs 0.951) and the difference between having SNP array data  
462 or not was much larger (0.951 vs 0.868).

463

#### 464 **Computational requirements**

465 The computational requirements of hybrid peeling were much less than those for multi-locus  
466 peeling. We compared the time it took multi-locus peeling to process the high-density SNP array  
467 with 2,000 markers used as an initial step of hybrid peeling to the time it took hybrid peeling to  
468 process the remaining sequence with 700,000 segregating loci when using the *focal plus all low*  
469 *coverage* sequencing set. We found that the initial multi-locus peeling step took 823 minutes and  
470 41 GB of memory to process 2,000 SNPs on 64,598 individuals, which translates to 6.3 hours per  
471 1,000 individuals per 1,000 loci. The hybrid peeling step was split across 1000 jobs of 700 SNPs  
472 each. Each job took an average of 40 minutes and 2.3 GB of memory, which translates to 53.5  
473 minutes per 1,000 individuals per 1,000 loci and a total of 40,344 minutes (roughly 28 core-days).

474

475

#### **Discussion**

476 In this paper we present a hybrid peeling method for calling, phasing, and imputing sequence data  
477 of any coverage in large pedigrees. This method is computationally efficient and enables the  
478 benefits of multi-locus peeling to be realised for data sets with tens of thousands of individuals on  
479 tens of millions of segregating variants. We evaluated the performance of hybrid peeling in calling  
480 and phasing sequence data in a livestock population and in imputing that sequence data to the non-  
481 sequenced individuals in the population. Hybrid peeling successfully used the pedigree to

482 propagate information between relatives to call genotypes and phase alleles for individuals with  
483 low and high sequencing coverage. Further, calling and phasing these individuals was most  
484 effective when the full pedigree was used. Hybrid peeling was also able to whole genome sequence  
485 to 60,000 animals with an accuracy above 0.98. We discuss these results in more detail below.

486

### 487 **Hybrid peeling as a genotype calling and phasing method**

488 We found that hybrid peeling effectively used pedigree information to call genotypes and phase  
489 alleles in a population of sequenced individuals. When using hybrid peeling, sequence data from  
490 an individual's parents and grandparents increased the number and accuracy of called genotypes  
491 and the number and accuracy of phased alleles compared to just using an individual's own  
492 sequence data. We also found that further increases in yield and accuracy could be gained by using  
493 more distant relatives. The benefits of using the full pedigree were most apparent for individuals  
494 that had low coverage sequencing data (1x and 2x), where in some cases the total genotype yield  
495 could rise from 0.1 based on the individuals own sequence data to over 0.9 using the sequence data  
496 from the entire pedigree. These results suggest that hybrid peeling could be used to increase the  
497 yield of calling and phasing sequence data in pedigrees. The application of hybrid peeling is not  
498 limited to individuals with whole genome sequence data, but may also be useful when handling  
499 data generated through genotyping via a reduced-representation sequencing (e.g. RAD-seq (Davey  
500 et al., 2011) or genotyping-by-sequencing (Elshire et al., 2011; Gorjanc et al., 2015)).

501 In addition to increasing genotype yield, hybrid peeling also allows for the phasing of many  
502 alleles. Using an individual's own sequence data limits the number of alleles that can be phased to  
503 just homozygous loci. In contrast, the number of phased heterozygous loci greatly increased if  
504 there was significant sequence coverage on the individual's parents, grandparents, or even more

505 distant relatives. The ability to accurately phase alleles will be important for downstream  
506 imputation and other analyses. Pedigree based methods, like hybrid peeling offer one route for  
507 obtaining this information. There are alternative methods that are based on hidden Markov models,  
508 e.g. Beagle (Browning and Browning, 2007). These methods phase individual's alleles by finding  
509 shared chromosome segments between an individual and its distant relatives. However, these  
510 methods currently do not scale well to performing whole genome sequence phasing and imputation  
511 for tens of thousands of individuals (Gilly et al., 2017), making them impractical for many  
512 livestock settings.

513         The power of hybrid peeling comes from its ability to combine sequence data across many  
514 related individuals. Hybrid peeling identifies shared chromosome segments between parents and  
515 their offspring, and propagates that information to all the individuals who share those segments.  
516 In many cases, particularly with low coverage sequence data it is not possible to clearly identify  
517 shared chromosome segments. Hybrid peeling handles those cases by marginalizing over the  
518 uncertainty of which chromosome was inherited and so potentially increases the accuracy rate over  
519 methods that initially require a high accuracy of determination of shared chromosome segments.  
520 By marginalizing over uncertainty, hybrid peeling is able to exploit even low coverage sequence  
521 data over many generations. When analysing the performance increase between phasing 1x  
522 individuals in the case of disconnected families, versus the case of the full pedigree, we found that  
523 most reliable indicator of phasing accuracy was the total amount of sequencing coverage for all of  
524 the individual's ancestors, and not the amount of sequencing coverage on the individual's parents  
525 and grandparent, suggesting that hybrid peeling is able to use even distant relatives to phase  
526 individuals.



527           The heavy reliance of pedigree based imputation is both a boon and a curse for hybrid  
528 peeling. As we discuss above, using pedigree information can lead to high accuracy, high yield  
529 genotype calling and phasing for low coverage individuals. The usefulness of this technique relies  
530 on multi-generational pedigree information being available. Although there is some benefit on  
531 using sequence information on an individual's parents and grandparents, the primary benefit comes  
532 from aggregating sequencing information across many generations. The availability of multi-  
533 generational pedigree information is generally routinely available in commercial livestock  
534 populations, but may be less available for human or wild animal populations. When limited  
535 pedigree information is unavailable, the performance of hybrid peeling may be less than that of  
536 non-pedigree based imputation methods that rely on linkage disequilibrium to call and phase  
537 sequence data (VanRaden et al., 2015). There may be some benefit in combining linkage based  
538 information with pedigree based information for calling and phasing animals in populations with  
539 shallow pedigrees where linkage information between disconnected populations can be exploited.  
540 Existing methods have already considered combining linkage based information on the context of  
541 multi-locus peeling (Meuwissen and Goddard, 2010), and for using pedigree based information in  
542 the context of linkage disequilibrium based calling and phasing algorithms (Chen et al., 2013;  
543 O'Connell et al., 2014). Future work is needed to analyse the optimal integration of hybrid peeling  
544 with linkage based methods for use in low-depth pedigrees.

545

#### 546 **Hybrid peeling as a whole pedigree imputation method**

547 We found that hybrid peeling could effectively use mixed coverage sequence data to impute whole  
548 genome sequence into the non-sequenced individuals in the pedigree. For the majority of  
549 individuals we obtained imputation accuracy of 0.98. Imputation accuracy was lower at the

550 beginning of the pedigree compared to the end of the pedigree due to the low ancestral sequencing  
551 coverage and the high number of individuals genotyped with low-density SNP arrays early in the  
552 pedigree. This trend identifies a difficulty that many pedigree based imputation methods face, i.e.,  
553 it is generally easier to impute children from their parents than it is to impute parents from their  
554 children. This difficulty arises from the fact that it is often challenging to phase parents based on  
555 their children's genotype. Doing so requires finding patterns of shared inheritance across multiple  
556 offspring, and generally requires many children (Ferdosi et al., 2014). In contrast, it is relatively  
557 easy to phase a child's genotype based on its parents' genotypes.

558 One of the more surprising results was the high accuracy observed for non-genotyped  
559 individuals. Restricted to the last four quintiles of individuals in the pedigree, non-genotyped  
560 individuals had an imputation accuracy of 0.959, which is only slightly less than the 0.988 accuracy  
561 for individuals that had high-density SNP array data. The only information that hybrid peeling had  
562 for non-genotyped individuals was their position in the pedigree and the list of parents, mates, and  
563 offspring. Using this information hybrid peeling was able to accurately reconstruct inheritance of  
564 chromosomes across generations, and impute these individuals up to whole genome sequence. The  
565 ability of hybrid peeling to impute non-genotyped pedigree members highlights the difference  
566 between pedigree and linkage disequilibrium based methods such as Beagle (Browning and  
567 Browning, 2007), Impute2 (Howie et al., 2009), or MaCH (Li et al., 2010), which require all  
568 individuals to be genotyped at, at least, with a low-density SNP array.

569 We also noted significant computational gains of hybrid peeling compared to the multi-locus  
570 peeling of Meuwissen and Goddard (2010). Both methods scale as  $O(NL)$  – linearly with the  
571 number of individuals ( $N$ ) and number of loci ( $L$ ). However, compared to full multi-locus peeling  
572 we found that hybrid peeling ran about 6 times faster and used less memory than full multi-locus

573 peeling. The increased speed stems from not having to update the segregation estimates at each  
574 locus. The decreased memory stems from being able to run each locus independently. This means  
575 that memory requirements of hybrid peeling scale linearly with the number of individuals  $O(N)$ ,  
576 while multi-locus peeling memory requirements scale linearly both with the number of individuals  
577 and number of loci  $O(NL)$ . The gains in speed and memory also lead to practical gains in  
578 implementing hybrid peeling. Because each locus is considered independent of the other loci given  
579 the segregation estimates, hybrid peeling is trivial to parallelize. Further, the lower memory  
580 requirement allows this parallelization to be done on even small machines. Parallelisation meant  
581 that although overall imputation time for 700,000 segregating loci on 64,598 individuals took 28  
582 days of CPU time, we were able to run it on a computing cluster in under 24 hours of real time.

583

584

### Conclusions

585 This paper presents hybrid peeling, a computationally tractable multi-locus peeling algorithm for  
586 whole genome sequence data. We demonstrated the effectiveness of hybrid peeling in calling,  
587 phasing, and imputing whole genome sequence in a large livestock population. We found that  
588 hybrid peeling could effectively use multiple generations of variable coverage sequence data to  
589 easily increase the yield and accuracy of called genotypes and phased alleles compared to using  
590 an individual's own sequence data. We also found that hybrid peeling could accurately impute  
591 whole genome sequence into non-sequenced individuals. We implemented a version of this  
592 method in the software package AlphaPeel, which is available from the AlphaGenes website  
593 (<http://www.alphagenes.roslin.ed.ac.uk>). Hybrid peeling has the potential to open the door the  
594 routine utilization of whole genome sequence in large pedigreed populations, increasing the  
595 accuracy of genomic prediction and the power to detect quantitative trait loci.

596

### **Author contributions**

597 AW, GG, and JMH designed the hybrid peeling algorithm. AW and DLW wrote the code. AW

598 and RR designed and ran the simulation study. All authors contributed to writing the manuscript.

599 **References**

- 600 Bishop, C.M. (2007). *Pattern Recognition and Machine Learning* (New York: Springer).
- 601 Browning, B.L., and Browning, S.R. (2009). A Unified Approach to Genotype Imputation and  
602 Haplotype-Phase Inference for Large Data Sets of Trios and Unrelated Individuals. *Am. J. Hum.*  
603 *Genet.* *84*, 210–223.
- 604 Browning, B.L., and Browning, S.R. (2016). Genotype Imputation with Millions of Reference  
605 Samples. *Am. J. Hum. Genet.* *98*, 116–126.
- 606 Browning, S.R., and Browning, B.L. (2007). Rapid and accurate haplotype phasing and missing-  
607 data inference for whole-genome association studies by use of localized haplotype clustering.  
608 *Am. J. Hum. Genet.* *81*, 1084–1097.
- 609 Burton, P.R., Clayton, D.G., Cardon, L.R., Craddock, N., Deloukas, P., Duncanson, A.,  
610 Kwiatkowski, D.P., McCarthy, M.I., Ouwehand, W.H., Samani, N.J., et al. (2007). Genome-  
611 wide association study of 14,000 cases of seven common diseases and 3,000 shared controls.  
612 *Nature* *447*, 661–678.
- 613 Cannings, C., Thompson, E.A., and Skolnick, H.H. (1976). The Recursive Derivation of  
614 Likelihoods on Complex Pedigrees. *Adv. Appl. Probab.* *8*, 622–625.
- 615 Cannings, C., Thompson, E.A., and Skolnick, M.H. (1978). Probability Functions on Complex  
616 Pedigrees. *Adv. Appl. Probab.* *10*, 26–61.
- 617 Chen, G.K., Marjoram, P., and Wall, J.D. (2009). Fast and flexible simulation of DNA sequence  
618 data. *Genome Res.* *19*, 136–142.
- 619 Chen, W., Li, B., Zeng, Z., Sanna, S., Sidore, C., Busonero, F., Kang, H.M., Li, Y., and  
620 Abecasis, G.R. (2013). Genotype calling and haplotyping in parent-offspring trios. *Genome Res.*  
621 *23*, 142–151.
- 622 Cheung, C.Y.K., Thompson, E.A., and Wijsman, E.M. (2013). GIGI: An Approach to Effective  
623 Imputation of Dense Genotypes on Large Pedigrees. *Am. J. Hum. Genet.* *92*, 504–516.
- 624 Cheung, C.Y.K., Marchani Blue, E., and Wijsman, E.M. (2014). A Statistical Framework to  
625 Guide Sequencing Choices in Pedigrees. *Am. J. Hum. Genet.* *94*, 257–267.
- 626 Daetwyler, H.D., Villanueva, B., and Woolliams, J.A. (2008). Accuracy of Predicting the  
627 Genetic Risk of Disease Using a Genome-Wide Approach. *PLoS ONE* *3*, e3395.
- 628 Daetwyler, H.D., Capitan, A., Pausch, H., Stothard, P., van Binsbergen, R., Brøndum, R.F., Liao,  
629 X., Djari, A., Rodriguez, S.C., Grohs, C., et al. (2014). Whole-genome sequencing of 234 bulls  
630 facilitates mapping of monogenic and complex traits in cattle. *Nat. Genet.* *46*, 858–865.

- 631 Davey, J.W., Hohenlohe, P.A., Etter, P.D., Boone, J.Q., Catchen, J.M., and Blaxter, M.L. (2011).  
632 Genome-wide genetic marker discovery and genotyping using next-generation sequencing. *Nat.*  
633 *Rev. Genet.* *12*, 499–510.
- 634 Elshire, R.J., Glaubitz, J.C., Sun, Q., Poland, J.A., Kawamoto, K., Buckler, E.S., and Mitchell,  
635 S.E. (2011). A robust, simple genotyping-by-sequencing (GBS) approach for high diversity  
636 species. *PLoS One* *6*, e19379.
- 637 Elston, R.C., and Stewart, J. (1971). A general model for the genetic analysis of pedigree data.  
638 *Hum. Hered.* *21*, 523–542.
- 639 Faux, A.-M., Gorjanc, G., Gaynor, R.C., Battagin, M., Edwards, S.M., Wilson, D.L., Hearne,  
640 S.J., Gonen, S., and Hickey, J.M. (2016). AlphaSim: Software for Breeding Program Simulation.  
641 *Plant Genome* *9*.
- 642 Ferdosi, M.H., Kinghorn, B.P., Werf, J.H.J. van der, and Gondro, C. (2014). Detection of  
643 recombination events, haplotype reconstruction and imputation of sires using half-sib SNP  
644 genotypes. *Genet. Sel. Evol.* *46*, 1–15.
- 645 Fernández, S.A., Fernando, R.L., Guldbbrandtsen, B., Totir, L.R., and Carriquiry, A.L. (2001).  
646 Sampling genotypes in large pedigrees with loops. *Genet. Sel. Evol.* *33*, 337.
- 647 Gilly, A., Kuchenbaecker, K., Southam, L., Suveges, D., Moore, R., Melloni, G., Hatzikotoulas,  
648 K., Farmaki, A.-E., Ritchie, G., Schwartzentruber, J., et al. (2017). Very low depth whole  
649 genome sequencing in complex trait association studies. *bioRxiv*.
- 650 Gonen, S., Ros-Freixedes, R., Battagin, M., Gorjanc, G., and Hickey, J.M. (2017). A method for  
651 the allocation of sequencing resources in genotyped livestock populations. *Genet. Sel. Evol.* *49*.
- 652 Gorjanc, G., Cleveland, M.A., Houston, R.D., and Hickey, J.M. (2015). Potential of genotyping-  
653 by-sequencing for genomic selection in livestock populations. *Genet. Sel. Evol.* *47*, 12.
- 654 Hayes, B.J., Visscher, P.M., and Goddard, M.E. (2009). Increased accuracy of artificial selection  
655 by using the realized relationship matrix. *Genet. Res.* *91*, 47–60.
- 656 Hickey, J.M. (2013). Sequencing millions of animals for genomic selection 2.0. *J. Anim. Breed.*  
657 *Genet.* *130*, 331–332.
- 658 Hickey, J.M., Kinghorn, B.P., Tier, B., Wilson, J.F., Dunstan, N., and Werf, J.H. van der (2011).  
659 A combined long-range phasing and long haplotype imputation method to impute phase for SNP  
660 genotypes. *Genet. Sel. Evol.* *43*, 12.
- 661 Hickey, J.M., Dreisigacker, S., Crossa, J., Hearne, S., Babu, R., Prasanna, B.M., Grondona, M.,  
662 Zambelli, A., Windhausen, V.S., Mathews, K., et al. (2014). Evaluation of genomic selection  
663 training population designs and genotyping strategies in plant breeding programs using  
664 simulation. *Crop Sci.* *54*, 1476–1488.

- 665 Howie, B.N., Donnelly, P., and Marchini, J. (2009). A flexible and accurate genotype imputation  
666 method for the next generation of genome-wide association studies. *PLoS Genet.* *5*, e1000529.
- 667 Kerr, R.J., and Kinghorn, B.P. (1996). An efficient algorithm for segregation analysis in large  
668 populations. *J. Anim. Breed. Genet.* *113*, 457–469.
- 669 Koller, D., and Friedman, N. (2009). *Probabilistic Graphical Models: Principles and Techniques*  
670 (Cambridge, MA: MIT Press).
- 671 Lander, E.S., and Green, P. (1987). Construction of multilocus genetic linkage maps in humans.  
672 *Proc. Natl. Acad. Sci. U. S. A.* *84*, 2363–2367.
- 673 Lauritzen, S.L., and Sheehan, N.A. (2003). Graphical Models for Genetic Analyses. *Stat. Sci.* *18*,  
674 489–514.
- 675 Li, Y., Willer, C.J., Ding, J., Scheet, P., and Abecasis, G.R. (2010). MaCH: using sequence and  
676 genotype data to estimate haplotypes and unobserved genotypes. *Genet. Epidemiol.* *34*, 816–834.
- 677 MacLeod, I.M., Larkin, D.M., Lewin, H.A., Hayes, B.J., and Goddard, M.E. (2013). Inferring  
678 Demography from Runs of Homozygosity in Whole-Genome Sequence, with Correction for  
679 Sequence Errors. *Mol. Biol. Evol.* *30*, 2209–2223.
- 680 Meuwissen, T., and Goddard, M. (2010). The Use of Family Relationships and Linkage  
681 Disequilibrium to Impute Phase and Missing Genotypes in Up to Whole-Genome Sequence  
682 Density Genotypic Data. *Genetics* *185*, 1441–1449.
- 683 Meuwissen, T., Hayes, B., and Goddard, M. (2016). Genomic selection: A paradigm shift in  
684 animal breeding. *Anim. Front.* *6*, 6–14.
- 685 Meuwissen, T.H.E., Hayes, B.J., and Goddard, M.E. (2001). Prediction of Total Genetic Value  
686 Using Genome-Wide Dense Marker Maps. *Genetics* *157*, 1819–1829.
- 687 O’Connell, J., Gurdasani, D., Delaneau, O., Pirastu, N., Ulivi, S., Cocca, M., Traglia, M., Huang,  
688 J., Huffman, J.E., and Rudan, I. (2014). A general approach for haplotype phasing across the full  
689 spectrum of relatedness. *PLoS Genet.* *10*, e1004234.
- 690 Piccolboni, A., and Gusfield, D. (2003). On the complexity of fundamental computational  
691 problems in pedigree analysis. *J. Comput. Biol. J. Comput. Mol. Cell Biol.* *10*, 763–773.
- 692 Rabiner, L. (1989). A tutorial on hidden Markov models and selected applications in speech  
693 recognition. *Proc. IEEE* *77*, 257–286.
- 694 Ros-Freixedes, R., Gonen, S., Gorjanc, G., and Hickey, J.M. (2017). A method for allocating  
695 low-coverage sequencing resources by targeting haplotypes rather than individuals. *Genet. Sel.*  
696 *Evol.* *49*.
- 697 Ros-Freixedes, R., Gonen, S., Gorjanc, G., and Hickey, J.M. A method for allocating low-  
698 coverage sequencing resources by targeting haplotypes rather than individuals. *GSE Final Rev.*

- 699 Totir, L.R., Fernando, R.L., and Abraham, J. (2009). An efficient algorithm to compute marginal  
700 posterior genotype probabilities for every member of a pedigree with loops. *Genet. Sel. Evol.* *41*,  
701 52.
- 702 Van Arendonk, J.A.M., Smith, C., and Kennedy, B.W. (1989). Method to estimate genotype  
703 probabilities at individual loci in farm livestock. *Theor. Appl. Genet.* *78*, 735–740.
- 704 VanRaden, P.M., Sun, C., and O’Connell, J.R. (2015). Fast imputation using medium or low-  
705 coverage sequence data. *BMC Genet.* *16*, 82.
- 706 Veerkamp, R.F., Bouwman, A.C., Schrooten, C., and Calus, M.P.L. (2016). Genomic prediction  
707 using preselected DNA variants from a GWAS with whole-genome sequence data in Holstein–  
708 Friesian cattle. *Genet. Sel. Evol.* *48*, 95.
- 709 Visscher, P.M., Wray, N.R., Zhang, Q., Sklar, P., McCarthy, M.I., Brown, M.A., and Yang, J.  
710 (2017). 10 Years of GWAS Discovery: Biology, Function, and Translation. *Am. J. Hum. Genet.*  
711 *101*, 5–22.
- 712



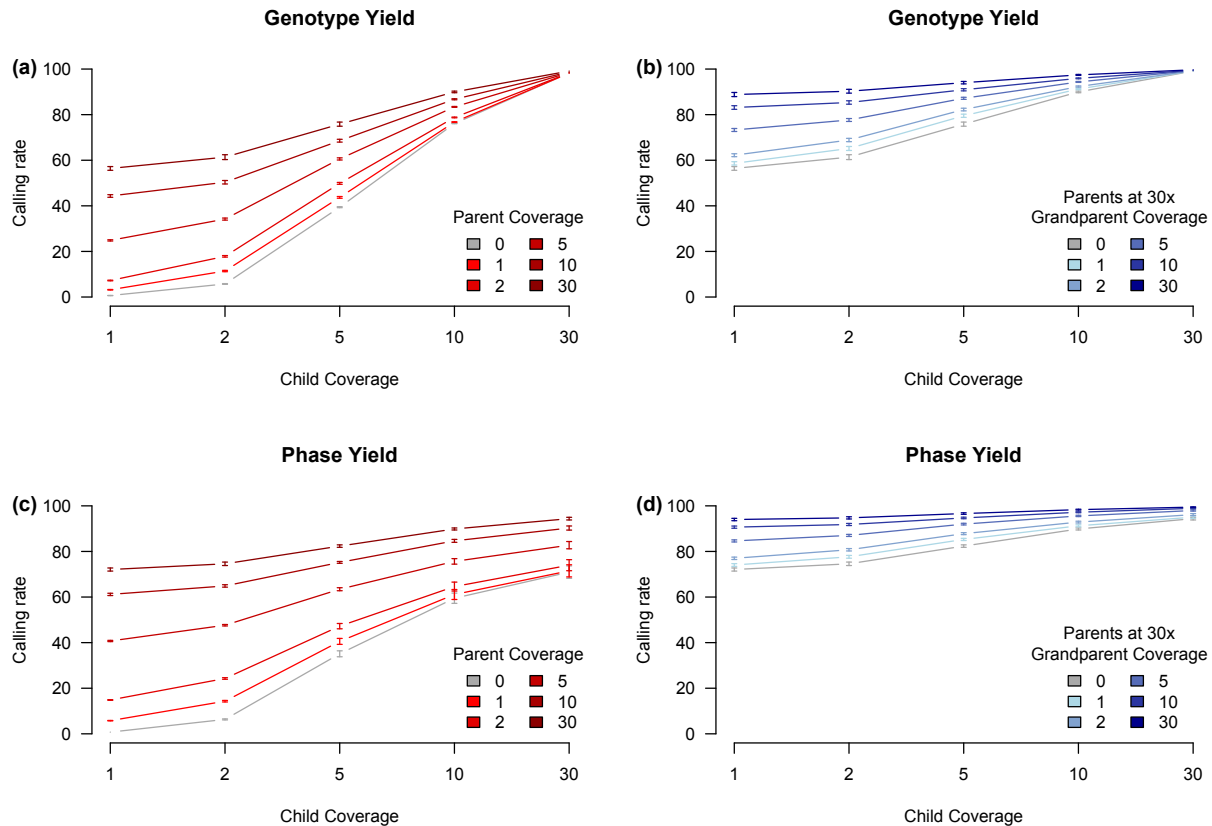

713

714 Figure 1

715 Genotype and phase yield while varying coverage in the focal individual and its parents and

716 grandparents. Panels (a) and (b) give the percentage of called genotypes while varying (a) the

717 coverage in parents and (b) the coverage in grandparents. Panels (c) and (d) give the percentage of

718 phased alleles while varying (c) the coverage in parents and (d) the coverage in grandparents. In

719 panels (b) and (d) the coverage in parents was constant at 30x. In all four panels the accuracy was

720 > .98. Error bars represent plus or minus one standard error based on ten replications.

721

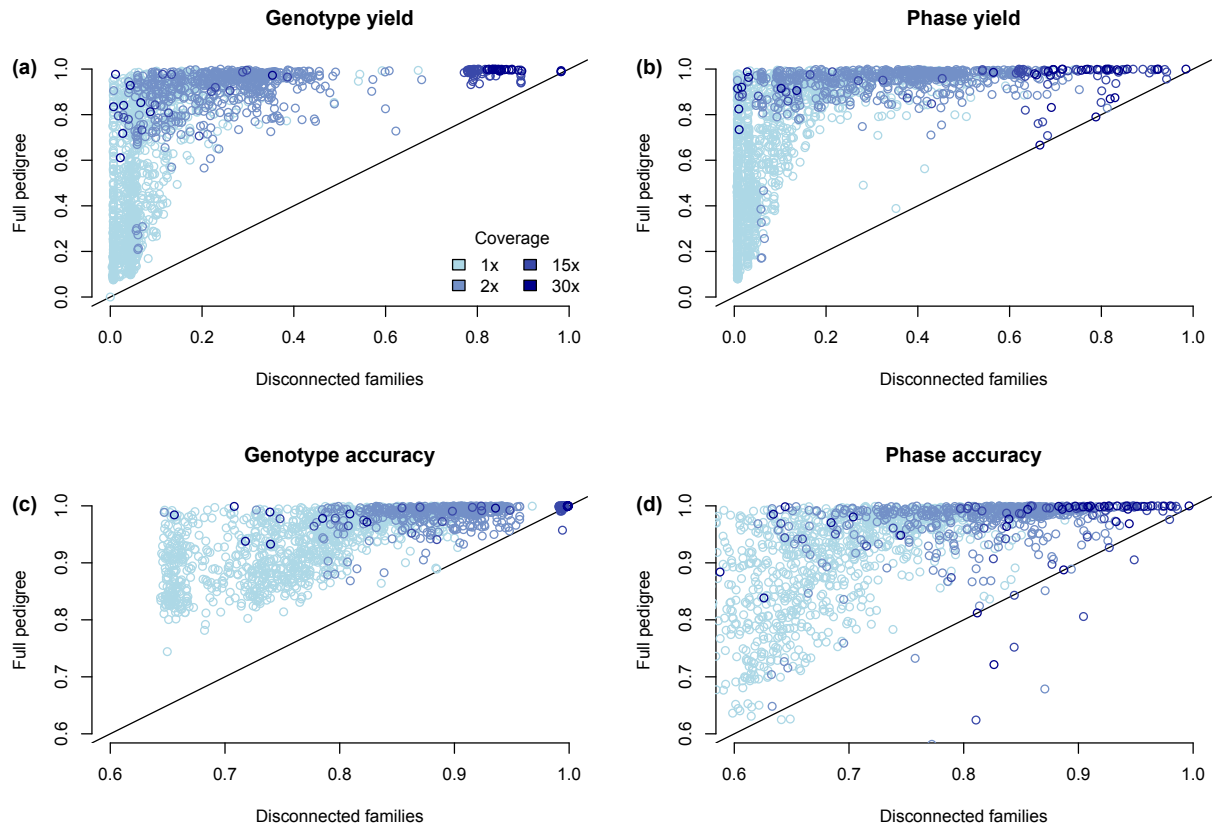

722

723 Figure 2

724 Genotype and phase yield and accuracy when hybrid peeling is run on a series of disconnected  
725 families containing a focal individual and its parents and grandparents, or as part of the full  
726 pedigree. Panels (a) and (c) give the performance of genotyping individuals, measured either with  
727 (a) the genotype yield or (c) the correlation between the true genotypes and the imputed genotype  
728 dosages. Panels (b) and (d) give the performance of phasing individuals, measured either with (a)  
729 the phase yield, or (c) the correlation between the true phase and the imputed phase.

730

731

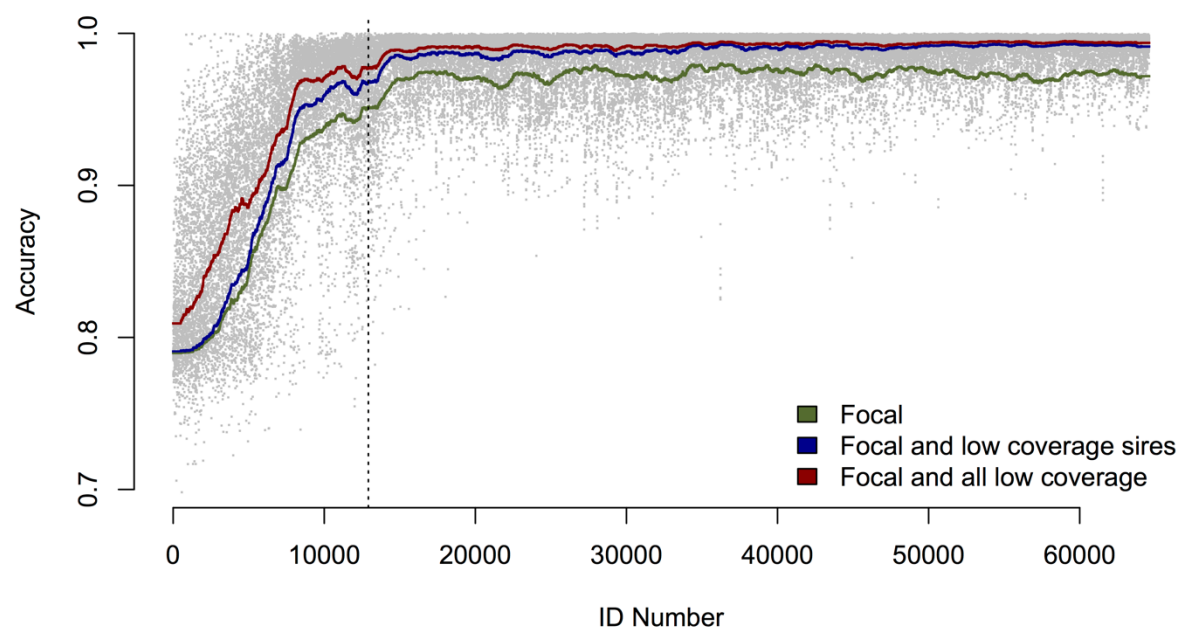

732

733 Figure 3

734 Individual imputation accuracy as a function of birth order (ID number). The green, blue, and red  
735 lines track the running average of 1000 individuals when respectively the *focal* individuals, the  
736 *focal and low coverage sires*, or the *focal and all low coverage* individuals were used for  
737 imputation. The grey dots show results for every individual when the *focal and all low coverage*  
738 individuals were used for imputation. The vertical dotted line represents the break between the  
739 first quintile of individuals and the remaining four quintiles of individuals.

740

741 Table 1

742 Examples of the trace function under single-locus peeling (a) and multi-locus peeling (b) when the  
743 child inherits the grandpaternal (first) allele.

744

| (a) Equal likelihood of inheritance |                  |                   | (b) Grandpaternal inheritance |                  |                   |
|-------------------------------------|------------------|-------------------|-------------------------------|------------------|-------------------|
| Parental haplotype                  | Inherited allele | Trace probability | Parental haplotype            | Inherited allele | Trace probability |
| aa                                  | a                | 1                 | <b>aa</b>                     | a                | 1                 |
| aA                                  | a                | 0.5               | <b>aA</b>                     | a                | 1                 |
| Aa                                  | a                | 0.5               | <b>Aa</b>                     | a                | 0                 |
| AA                                  | a                | 0                 | <b>AA</b>                     | a                | 0                 |
| aa                                  | A                | 0                 | <b>aa</b>                     | A                | 0                 |
| aA                                  | A                | 0.5               | <b>aA</b>                     | A                | 0                 |
| Aa                                  | A                | 0.5               | <b>Aa</b>                     | A                | 1                 |
| AA                                  | A                | 1                 | <b>AA</b>                     | A                | 1                 |

745

746 Table 2

747 Number of sequenced animals and cost by sequence coverage and the three sequencing sets.

| Coverage | <i>Focal</i> |           | <i>Focal and low coverage sires</i> |           | <i>Focal and all low coverage</i> |           |
|----------|--------------|-----------|-------------------------------------|-----------|-----------------------------------|-----------|
|          | N            | Cost (\$) | N                                   | Cost (\$) | N                                 | Cost (\$) |
| 1x       | 33           | 3,531     | 33                                  | 3,531     | 1,282                             | 137,174   |
| 2x       | 78           | 13,650    | 479                                 | 83,825    | 530                               | 92,750    |
| 15x      | 64           | 28,608    | 64                                  | 28,608    | 64                                | 28,608    |
| 30x      | 36           | 30,780    | 36                                  | 30,780    | 36                                | 30,780    |
| Total    | 211          | 76,569    | 612                                 | 146,744   | 1,912                             | 289,312   |

748

749 Table 3

750 Median imputation accuracy for non-sequenced individuals as a function of used sequencing data  
751 sets and individual's SNP array genotype status. These measures were taken over (a) all non-  
752 sequenced individuals or (b) the final four quintiles of the population. .

| All individuals              | High density | Low density | No genotype |
|------------------------------|--------------|-------------|-------------|
| Focal                        | 0.967        | 0.936       | 0.855       |
| Focal and low coverage sires | 0.983        | 0.952       | 0.863       |
| Focal plus all low coverage  | 0.987        | 0.971       | 0.881       |

753

| Final four quintiles         | High density | Low density | No genotype |
|------------------------------|--------------|-------------|-------------|
| Focal                        | 0.968        | 0.968       | 0.939       |
| Focal and low coverage sires | 0.984        | 0.985       | 0.953       |
| Focal plus all low coverage  | 0.987        | 0.988       | 0.959       |

754
